# Supplementary material
Source: PubMed Central journal article supplement (PMC6445360)
Supplement: NIHMS80870-supplement-1.pdf [file NIHMS80870-supplement-1.pdf]

**Supplementary Data**

***Roblek et al.***

**CCL2 is a vascular permeability factor inducing CCR2-dependent endothelial retraction during lung metastasis**

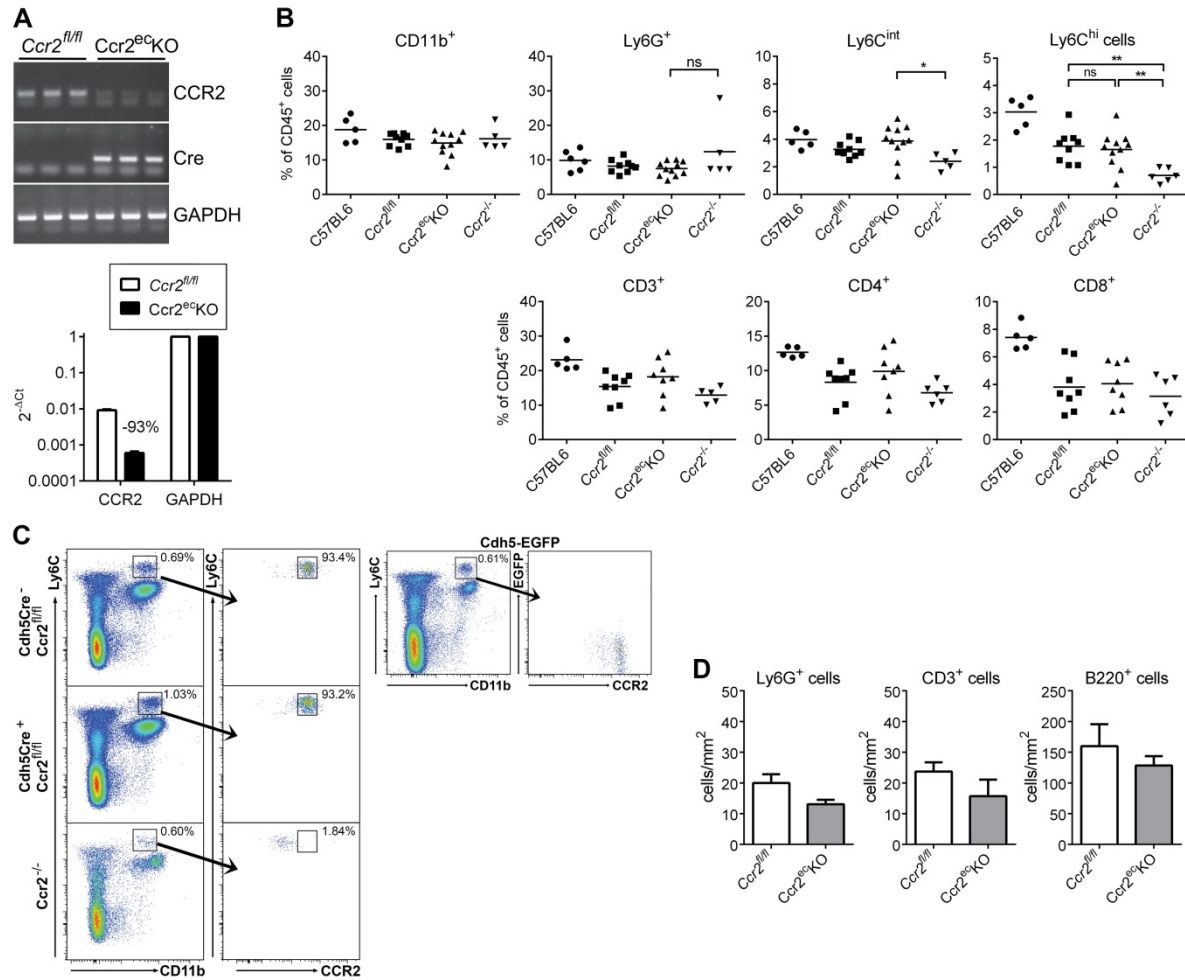

**Supplementary Figure 1. Characterization of *Ccr2<sup>ec</sup>KO* mice and analysis of primary tumors.** **A)** Agarose gel electrophoresis of CCR2, Cre and GAPDH amplified from sorted pulmonary endothelial cells from *Ccr2<sup>fl/fl</sup>* and *Ccr2<sup>ec</sup>KO* littermates (top). Expression levels of sorted pulmonary endothelial cells from *Ccr2<sup>fl/fl</sup>* and *Ccr2<sup>ec</sup>KO* littermates by qPCR (bottom). Data are represented as relative expression levels ( $2^{-\Delta Ct}$ ) normalized to GAPDH. (*Ccr2<sup>fl/fl</sup>* n=5; *Ccr2<sup>ec</sup>KO* n=9). **B)** Flow cytometry analysis of relative amounts of myeloid cells ( $CD45^+CD11b^+$ ), neutrophils ( $CD45^+CD11b^+Ly6G^+$ ),  $Ly6C^{int}$  monocytes ( $CD45^+CD11b^+Ly6G^-Ly6C^{int}$ ), inflammatory monocytes ( $CD45^+CD11b^+Ly6G^-Ly6C^{hi}$ ), T cells ( $CD45^+CD3^+$ ),  $CD4^+$  T cells ( $CD45^+CD3^+CD4^+$ ) and  $CD8^+$  T cells ( $CD45^+CD3^+CD8^+$ ) in peripheral blood of C57BL6, *Ccr2<sup>fl/fl</sup>*, *Ccr2<sup>ec</sup>KO*, and *Ccr2<sup>-/-</sup>* mice. Statistical significance was assessed using unpaired t-test; \*\*, p<0.01; \*, p<0.05; ns = not significant. **C)** Flow cytometry analysis of CCR2 expression on circulating cells ( $CD11b^+Ly6C^{hi}$ ) from *Ccr2<sup>ec</sup>KO*, *Ccr2<sup>fl/fl</sup>* and *Ccr2<sup>-/-</sup>* mice. Analysis of the CCR2 expression on VE-cadherin-positive cells using a reporter mouse (*Cdh5-GFP*), expressing GFP under the VE-cadherin promoter (right panel). **D)** Histological analysis of primary tumors using Ly6G, CD3 and B220 antibodies.

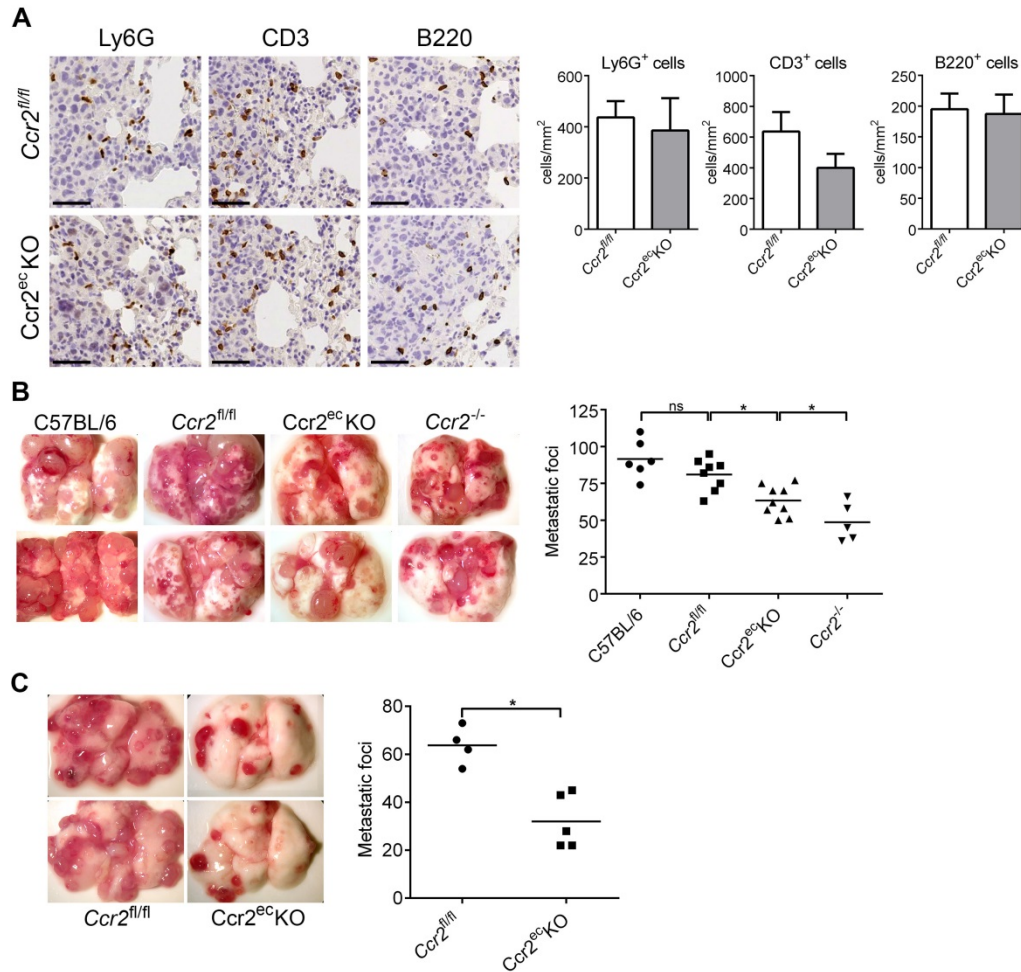

**Supplementary Figure 2 Endothelial CCR2 is required for generation of spontaneous and experimental lung metastasis. A)** Representative images of spontaneous lung metastasis stained with Ly6G, CD3, and B220 Abs, respectively were quantified. **B)** Experimental lung metastasis of i.v. injected MC-38GFP cells in C57BL/6, *Ccr2<sup>fl/fl</sup>*, *Ccr2<sup>ec</sup>KO*, and *Ccr2<sup>-/-</sup>* mice after 28 days. Representative lung images are shown in the left panel. **C)** Experimental metastasis in *Ccr2<sup>fl/fl</sup>* and *Ccr2<sup>ec</sup>KO* mice 15 days after i.v. injection of LLC1.1 cells with corresponding representative lung images. \*, p<0.05; \*\*, p<0.01; ns = not significant.

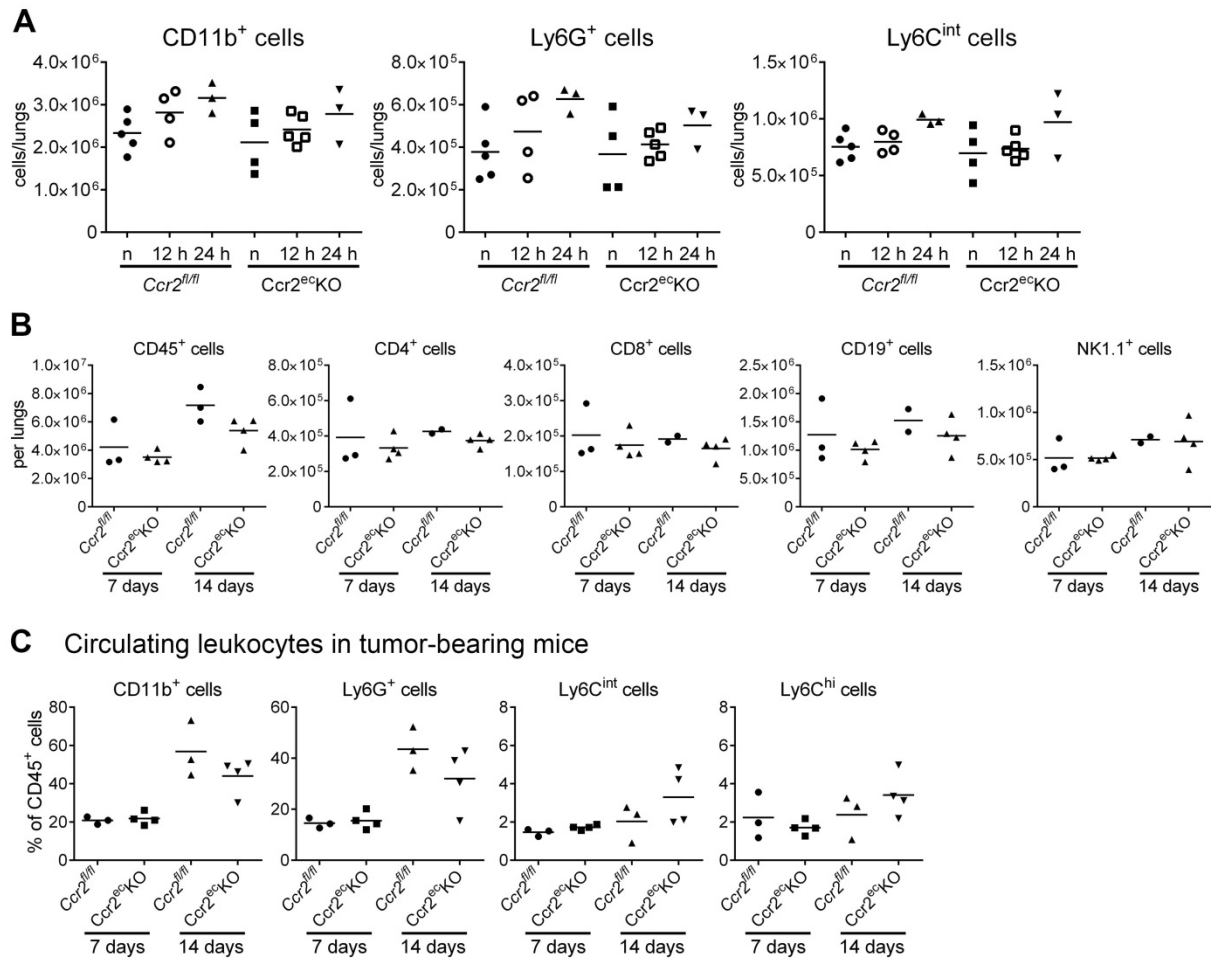

**Supplementary Figure 3. Formation of the metastasis niche in the lungs is unaffected in *Ccr2*<sup>ecKO</sup> mice.** **A)** Flow cytometry analysis of myeloid cells (CD45<sup>+</sup>CD11b<sup>+</sup>), granulocytes (CD45<sup>+</sup>CD11b<sup>+</sup>Ly6G<sup>+</sup>), and Ly6C<sup>int</sup> monocytes (CD45<sup>+</sup>CD11b<sup>+</sup>Ly6G<sup>-</sup>Ly6C<sup>int</sup>) recruited to lungs 12 h and 24 h p.i. in *Ccr2*<sup>fl/fl</sup> and *Ccr2*<sup>ecKO</sup> mice. n = untreated naive mice. **B)** Flow cytometry analysis of CD45<sup>+</sup> cells, T cells (CD45<sup>+</sup>CD11b<sup>-</sup>CD19<sup>-</sup>CD3<sup>+</sup>), B cells (CD45<sup>+</sup>CD11b<sup>-</sup>CD19<sup>+</sup>), NK cells (CD45<sup>+</sup>CD11b<sup>-</sup>CD19<sup>-</sup>CD3<sup>-</sup>NK1.1<sup>+</sup>), CD4<sup>+</sup> T cells (CD45<sup>+</sup>CD11b<sup>-</sup>CD19<sup>-</sup>CD3<sup>+</sup>CD4<sup>+</sup>), and CD8<sup>+</sup> T (CD45<sup>+</sup>CD11b<sup>-</sup>CD19<sup>-</sup>CD3<sup>+</sup>CD8<sup>+</sup>) cells recruited to lungs of mice s.c.-injected with LLC cells after 7 and 14 days. **C)** Flow cytometry analysis of myeloid cells (CD45<sup>+</sup>CD11b<sup>+</sup>), granulocytes (CD45<sup>+</sup>CD11b<sup>+</sup>Ly6G<sup>+</sup>), Ly6C<sup>int</sup> monocytes (CD45<sup>+</sup>CD11b<sup>+</sup>Ly6G<sup>-</sup>Ly6C<sup>int</sup>), and inflammatory monocytes (CD45<sup>+</sup>CD11b<sup>+</sup>Ly6C<sup>hi</sup>Ly6G<sup>-</sup>) in the circulation of mice s.c.-injected with LLC cells after 7 and 14 days.

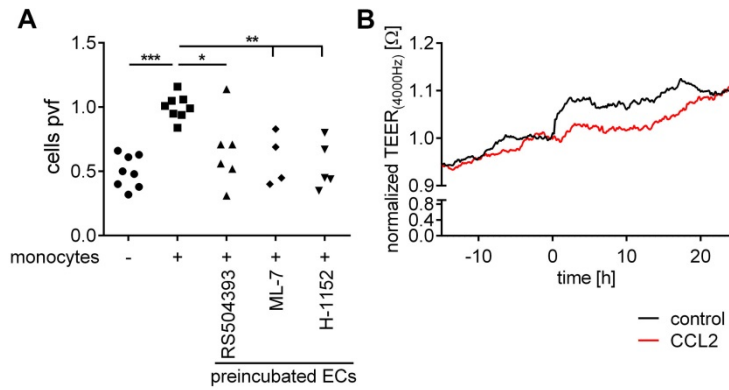

**Supplementary Figure 4. Inhibition of CCL2-induced endothelial retraction attenuates tumor cell migration.** **A)** Trans-endothelial migration of 4T1 murine breast cancer cells in the presence (+) or the absence (-) of CD115<sup>+</sup> monocytes after 16 hours. Endothelial cells were pre-treated with RS-504393 (50 μM), ML-7 (1 μM), and H-1152 (5 μM) for two hours and washed out of the inhibitor prior to adding of 4T1 cells with/without monocytes. The number of transmigrated cells was counted per view field (pvf) and is normalized to the control (+ monocytes). Statistical significance was assessed using unpaired t-test; \*, p<0.05; \*\*, p<0.01; \*\*\*, p<0.001. **B)** TEER values for rhCCL2-treated and control samples were normalized to 1 at the start of stimulation (0 h). TEER measurement profile over time (lower panel) (alternative presentation of data shown in Figure 4D).

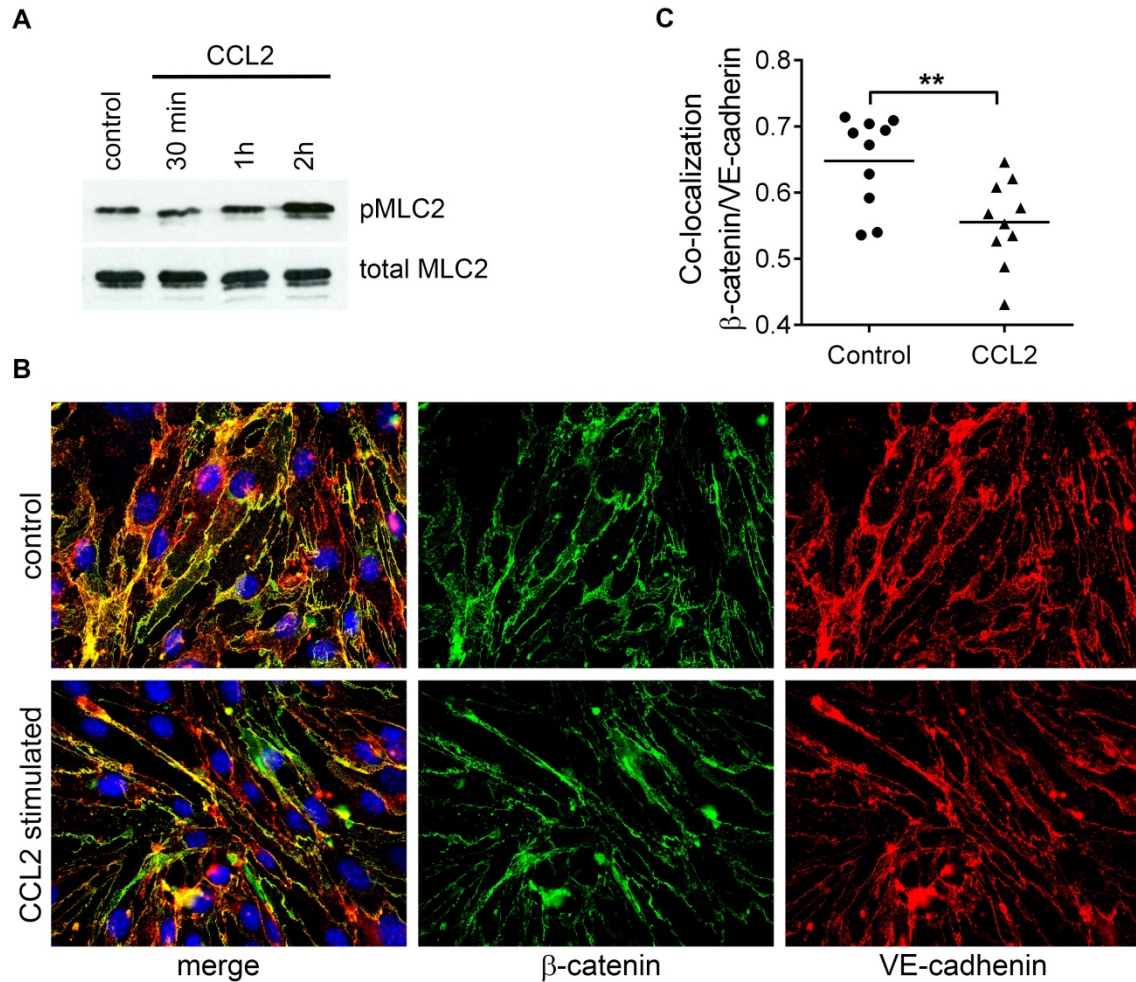

**Supplementary Figure 5. CCL2 stimulation of endothelial cells induces phosphorylation of myosin-light chain 2 and dissociation of VE-cadherin/b-catenin complexes. A)** Immune-detection of phosphorylated MLC2 (pMLC2) in the lysates of bEnd.3 endothelial cells after pre-activation with IL1- $\beta$  and stimulation with CCL2 (100 ng/ml) for indicated time points. Total MLC2 detection served as control. Per lane 20  $\mu$ g of protein lysate were loaded. **B)** Co-localization analysis of  $\beta$ -catenin with VE-cadherin expression in bEnd.3 cells. Endothelial cell line bEnd.3 was stimulated with 40ng/ml of IL1- $\beta$  for 2h, washed and activated with 100 ng/ml of CCL2 for 1h. Cells were fixed with ice-cold methanol, permeabilized with Saponin 0.1%, blocked with 1% BSA and stained sequentially with rabbit-anti-mouse  $\beta$ -catenin (D10A8, Cell Signaling) and rat-anti-mouse VE-cadherin (Cl. 11D4.1, BD) with respective secondary antibodies. **C)** Co-localization of  $\beta$ -catenin and VE-cadherin was quantified using Fiji software (Pearson's R value) analyzing 10 different view-fields, \*\*,  $p < 0.01$ .

**Table 1.** Primer used in this work.

| primer                  | 5'-3'                                                               |
|-------------------------|---------------------------------------------------------------------|
| Cre_fw<br>Cre_rev       | TGG CAG AAC GAA AAC GCT GG<br>TCT GAC CCG GCA AAA CAG GT            |
| CCR2_fw<br>CCR2_rev     | ATC CAC GGC ATA CTA TCA ACA TC<br>CAA GGC TCA CCA TCA TCG TAG       |
| E-Sel_fw<br>E-Sel_rev   | CGC CAG AAC AAC AAT TCC AC<br>ACT GGA GGC ATT GTA GTA CC            |
| VCAM-1_fw<br>VCAM-1_rev | GCG GTC TTG GGA GCC TCA AC<br>GTG ACT CGC AGC CCG TAG TG            |
| SAA1+2_fw<br>SAA1+2_rev | TCG GGG GAA CTA TGA TGC TGC<br>CAC TGC GGC CAT GTC TGT TG           |
| SAA3_fw<br>SAA3_rev     | TGC ATC TTG ATC CTG GGA GTT GAC<br>CAT AGT TCC CCC GAG CAT GGA AG   |
| S100A4_fw<br>S100A4_rev | TCA GGC AAA GAG GGT GAC AAG TTC<br>ATT GTC CCT GTT GCT GTC CAA GT   |
| S100A8_fw<br>S100A8_rev | TCA CCA TGC CCT CTA CAA GAA TGA C<br>TGC CAC ACC CAC TTT TAT CAC CA |
| S100A9_fw<br>S100A9_rev | CAC TGC TCT TAC CAA CAT CTG TGA C<br>GGG TGT CAG GGT GTC CTT CC     |
| GAPDH_fw<br>GAPDH_rev   | CCC AGC AAG GAC ACT GAG CAA<br>GTG GGT GCA GCG AAC TTT ATT GAT G    |
